# Supplementary material
Source: publisher figshare collection journal article supplement (https://future-science-group.figshare.com/ndownloader/files/27866931)
Supplement: Supplementary file 1 [file 27866931]

**Supplementary Figure 1.**

| ***GRIN1*** | **CpG1 CpG2 CpG3** |
| --- | --- |
| Human | 5’ GTT**CGCG**C**CGCG**CAGAGCCAGGCC**CGCG**GCC**CG**AGCCCATGAGCACCATG**CG**CCTGCTGA**CG**CT**CG**CCCTGCTGTTCTC3’ |
|  | 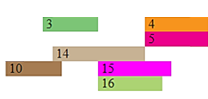 |
|  | **3:AP-2alphaA 14:C/EBPβ 4:Pax-5** |
|  | **10:XBP-1 15:MyoD 5:p53** |
|  | **14:C/EBPβ 16:c-Jun** |
